# Supplementary material for: Nanostructuring one-dimensional and amorphous lithium peroxide for high round-trip efficiency in lithium-oxygen batteries
Source: PubMed Central journal article supplement (PMC5813182; doi:10.1038/s41467-017-02727-2), 2018-02-14
Supplement: 41467_2017_2727_MOESM1_ESM.pdf [file 41467_2017_2727_MOESM1_ESM.pdf]

## Supplementary Information

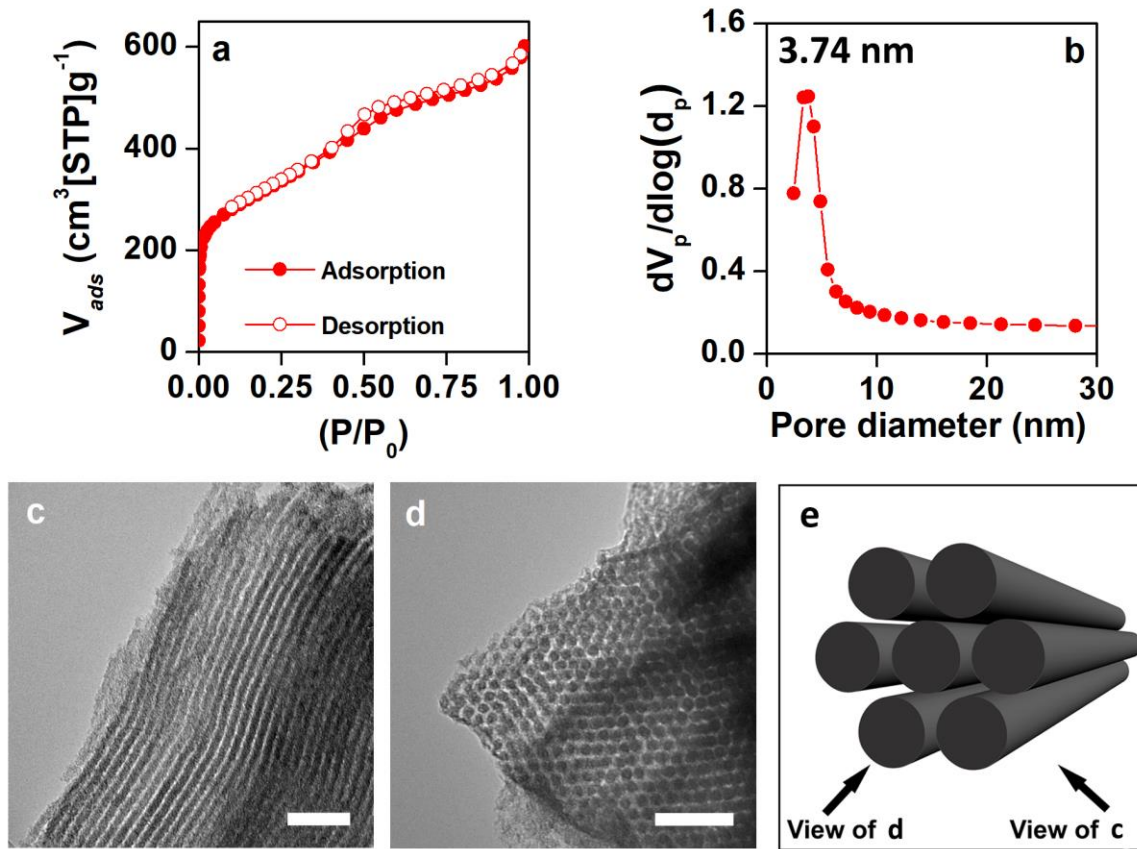

**Supplementary Figure 1** Characterization of as-prepared CMK-3 structure. **a** N<sub>2</sub> adsorption/desorption isotherm and **b** Barrett-Joyner-Halenda (BJH) pore-size distribution. **c-d** TEM images and **e** illustration of hexagonally ordered mesoporous channels. The scale bars in **c** and **d** indicate 50 nm. The arrows in **e** indicate the point of view for CMK-3, which corresponds to TEM images of **c** and **d**.

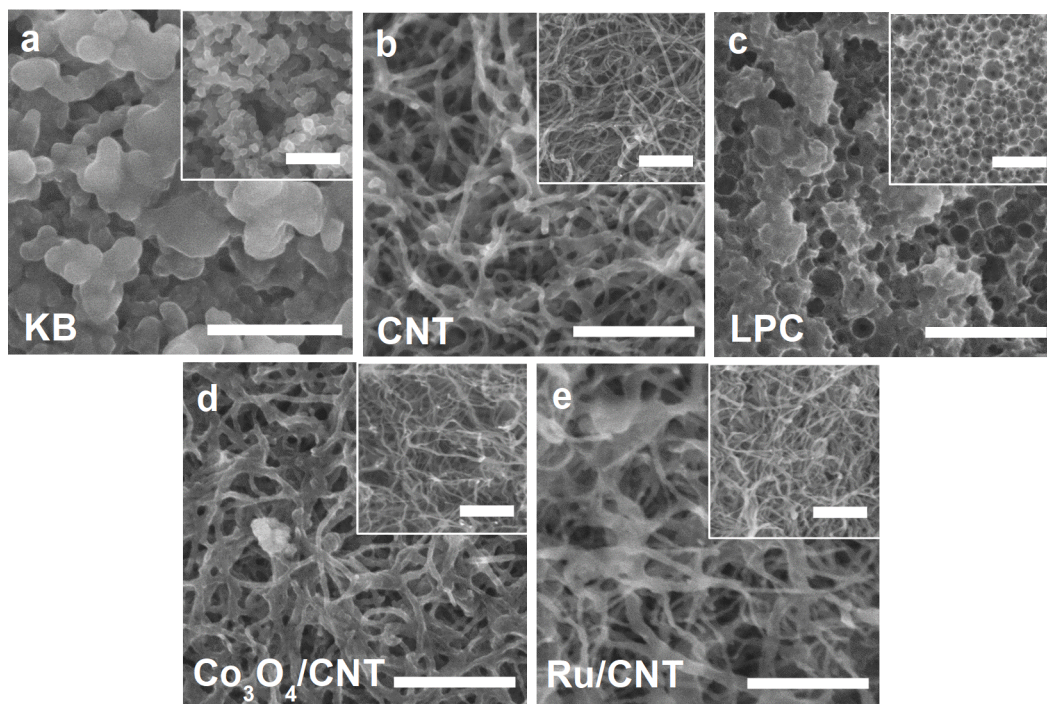

**Supplementary Figure 2** Scanning electron microscopy (SEM) images for **a** KB, **b** CNT, **c** LPC, **d**  $\text{Co}_3\text{O}_4/\text{CNT}$  and **e**  $\text{Ru}/\text{CNT}$  electrodes after DC to 1.5 mAh. All the scale bars indicate 500 nm. The insets show the corresponding as-prepared electrodes and the scale bars indicate 250 nm.

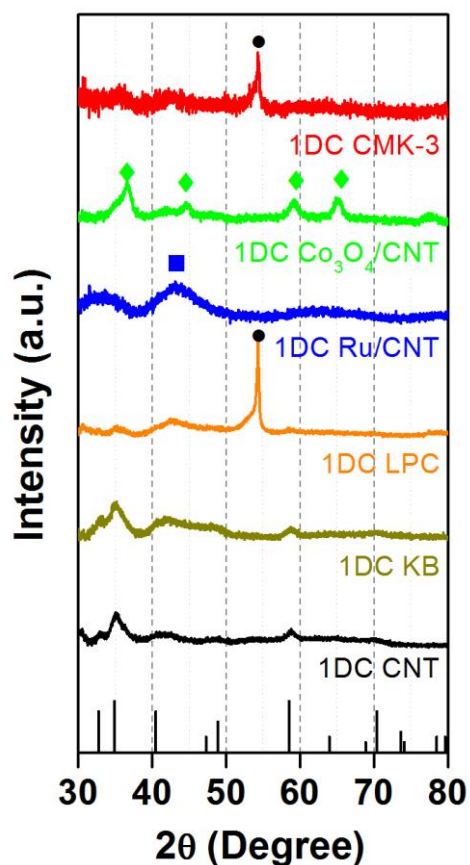

**Supplementary Figure 3** X-ray diffraction (XRD) patterns of DC electrodes to 1.5 mAh and reference of  $\text{Li}_2\text{O}_2$  (bottom line). The symbols of black circle (●), green diamond (◆) and blue square (■) indicate graphite (004) arising from porous carbon paper used as current collector for CMK-3 and LPC, face-centered cubic  $\text{Co}_3\text{O}_4$  (fcc,  $Fd\bar{3}m$ , JCPDS card no. 01-080-1533) and broad Ru reflection (JCPDS card No. 06-0663) respectively. The crystalline  $\text{Li}_2\text{O}_2$  reflections appear for the 1DC LPC, KB and CNT.

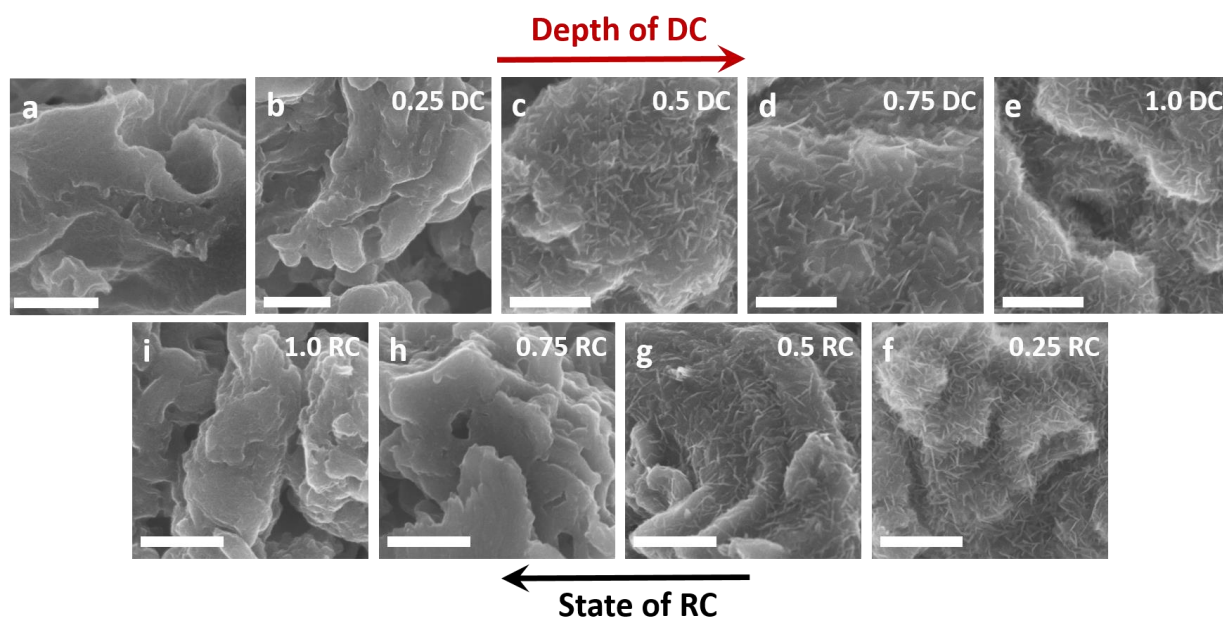

**Supplementary Figure 4** SEM images of CMK-3 electrodes of **a** as prepared, **b–e** different depth of DC and **f–i** different state of RC denoted by  $Q/Q_{total}$  at a fixed  $Q_{total}$  of 1.0 mAh and the current rate of  $50 \text{ mA g}^{-1}_{\text{carbon}}$ . The scale bars indicate 500 nm.

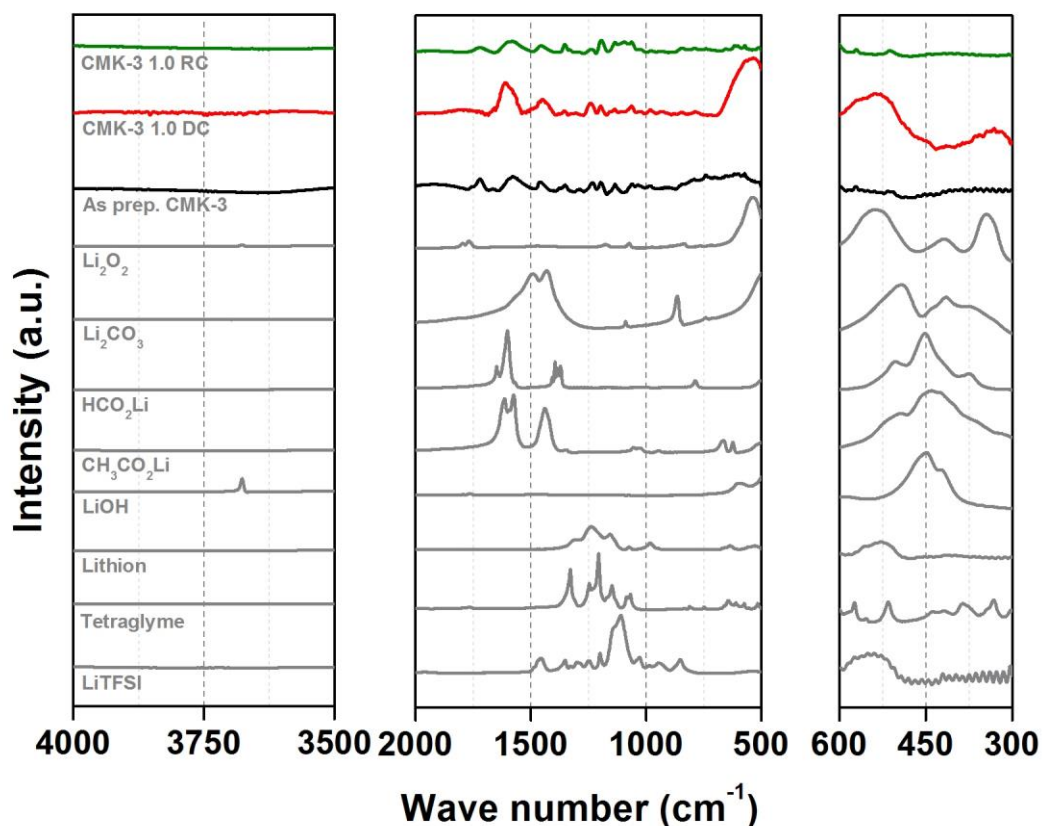

**Supplementary Figure 5** FT-IR spectra of DC and RC CMK-3 electrodes with standard references of  $\text{Li}_2\text{O}_2$ ,  $\text{Li}_2\text{CO}_3$ ,  $\text{HCO}_2\text{Li}$ ,  $\text{CH}_3\text{CO}_2\text{Li}$ ,  $\text{LiOH}$ , LITHion (binder), tetraglyme and LiTFSI. All CMK-3 electrodes were washed with acetonitrile and dried at 60 °C in vacuum before measurement of FT-IR. 1DC and 1RC samples were the electrodes after 100% DC and RC (a capacity of 1.0 mAh). The  $\text{Li}_2\text{O}_2$ -related signals at  $\sim 350$  and  $\sim 535$   $\text{cm}^{-1}$  appear to 1DC CMK-3 and disappear after RC. The  $\text{CO}_3^{2-}$  stretching modes ( $\sim 1440$  and  $1500$   $\text{cm}^{-1}$ ) and  $\text{CO}_2^-$  stretching mode and deformation ( $1370$ – $1615$   $\text{cm}^{-1}$ ) are apparent for 1DC CMK-3<sup>1</sup>.

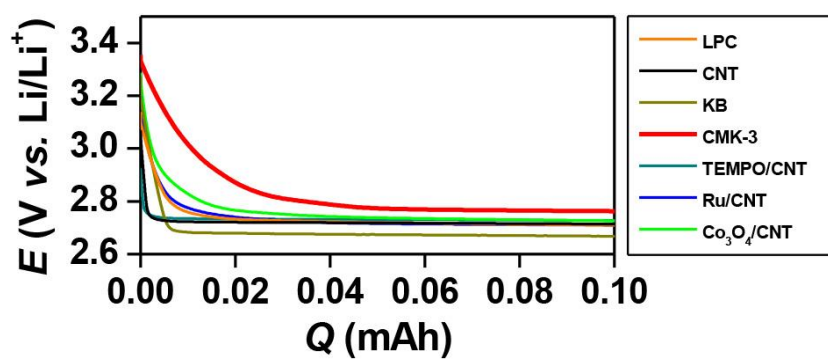

**Supplementary Figure 6** Comparison of DC potentials for various carbon electrodes at initial stage (0–0.1 mAh), captured from Figure 1a. CMK-3 has higher DC potential than others.

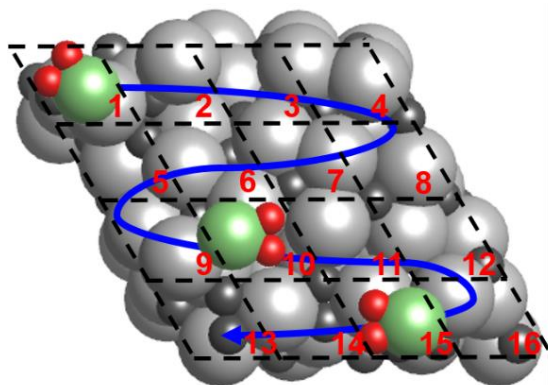

**Supplementary Figure 7** The amorphous  $\text{Li}_2\text{O}_2$  model used in this study<sup>2</sup>. The numbers indicate 16 sites for possible  $\text{LiO}_2$  adsorption. Lithium is light gray and light green; Oxygen is dark gray and red.

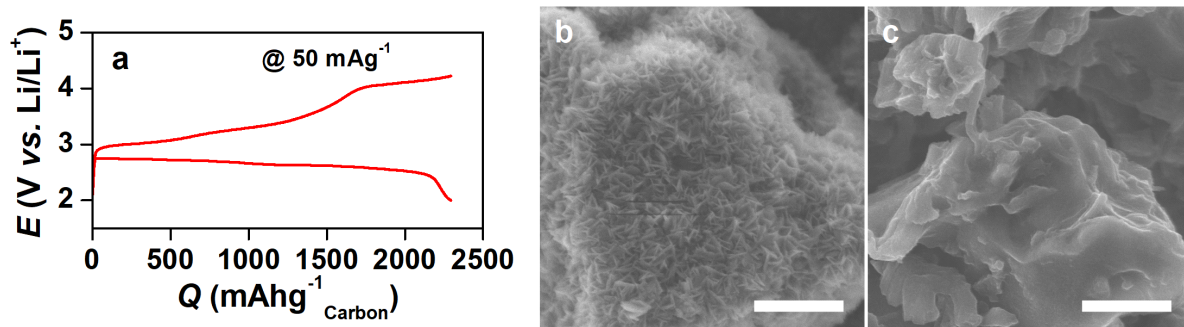

**Supplementary Figure 8** Full DC and RC profiles of CMK-3 at the cut off DC potential of 2.0 V and RC to the equivalent capacity and electrode images. **a** Galvanostatic profile at a current rate of  $50 \text{ mA g}^{-1}_{\text{carbon}}$ . SEM images after **b** full DC and **c** full RC. The scale bars indicate 1  $\mu\text{m}$ .



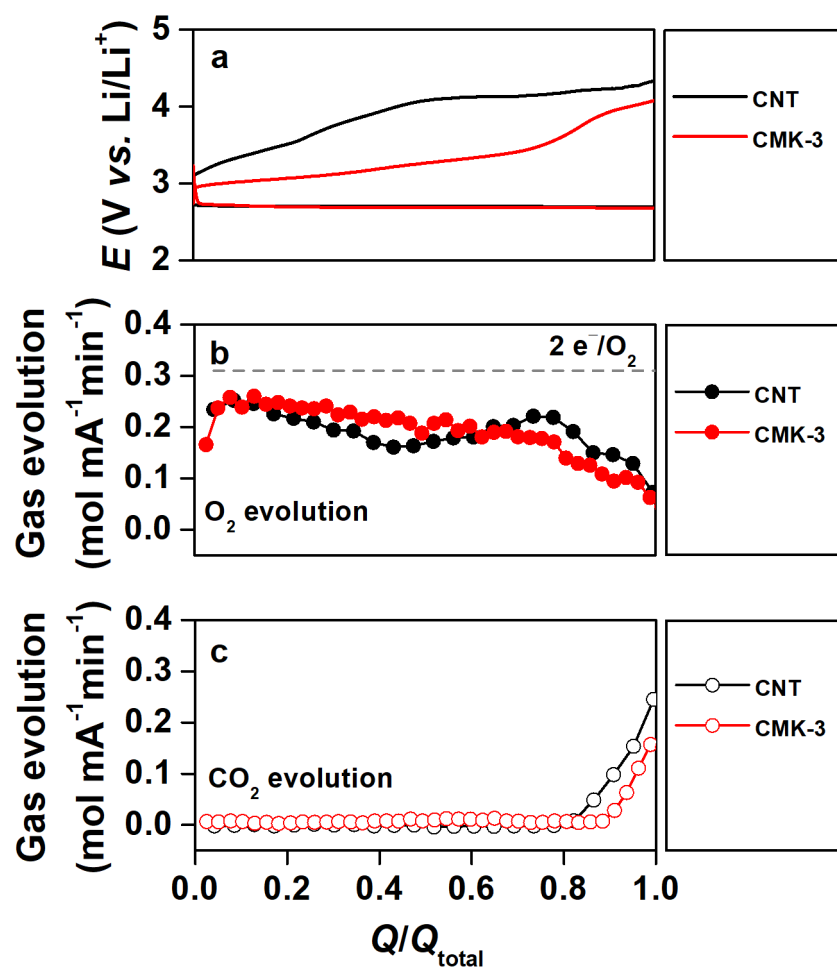

**Supplementary Figure 9** Comparison of online electrochemical mass spectrometry (OEMS) data of CMK-3 and CNT electrodes under identical conditions. **a** DC-RC profiles. Online **b** O<sub>2</sub> and **c** CO<sub>2</sub> evolution data during RC. CMK-3 shows 3.17 e<sup>-</sup>/O<sub>2</sub> oxidation during charge whereas the value of the same for CNT electrode is 3.31 e<sup>-</sup>/O<sub>2</sub>. It is further notable that the charging overpotential for CNT is much higher, leading to larger amount of CO<sub>2</sub> evolution.

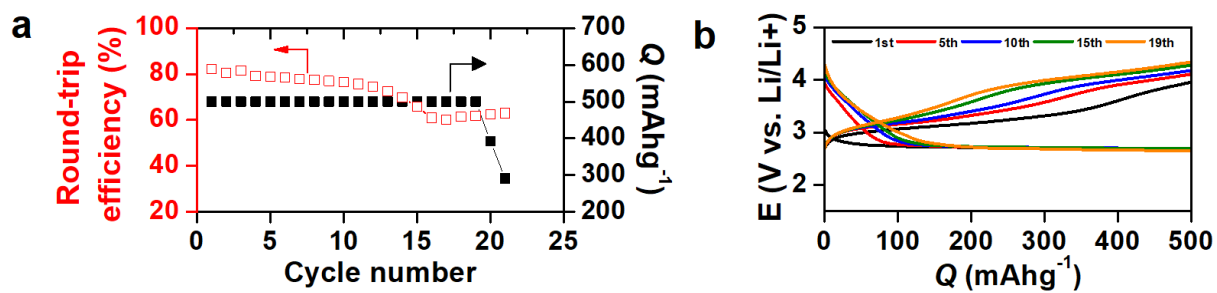

**Supplementary Figure 10** Cycling performance of CMK-3. **a** The round-trip efficiency and **b** DC-RC curves at a limited capacity of 500 mAh g<sup>-1</sup><sub>carbon</sub> and current rate of 50 mA g<sup>-1</sup><sub>carbon</sub>.

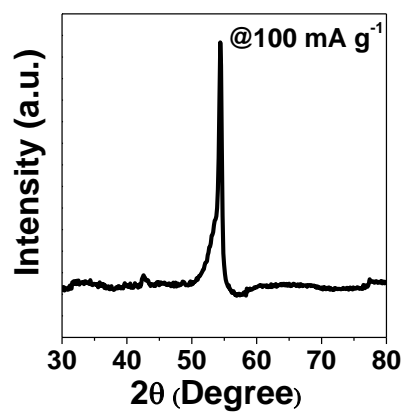

**Supplementary Figure 11** XRD patterns of DC product of conformal film acquired at a current rate of  $100 \text{ mA g}^{-1}_{\text{carbon}}$  and a fixed DC capacity of  $500 \text{ mAh g}^{-1}_{\text{carbon}}$ .

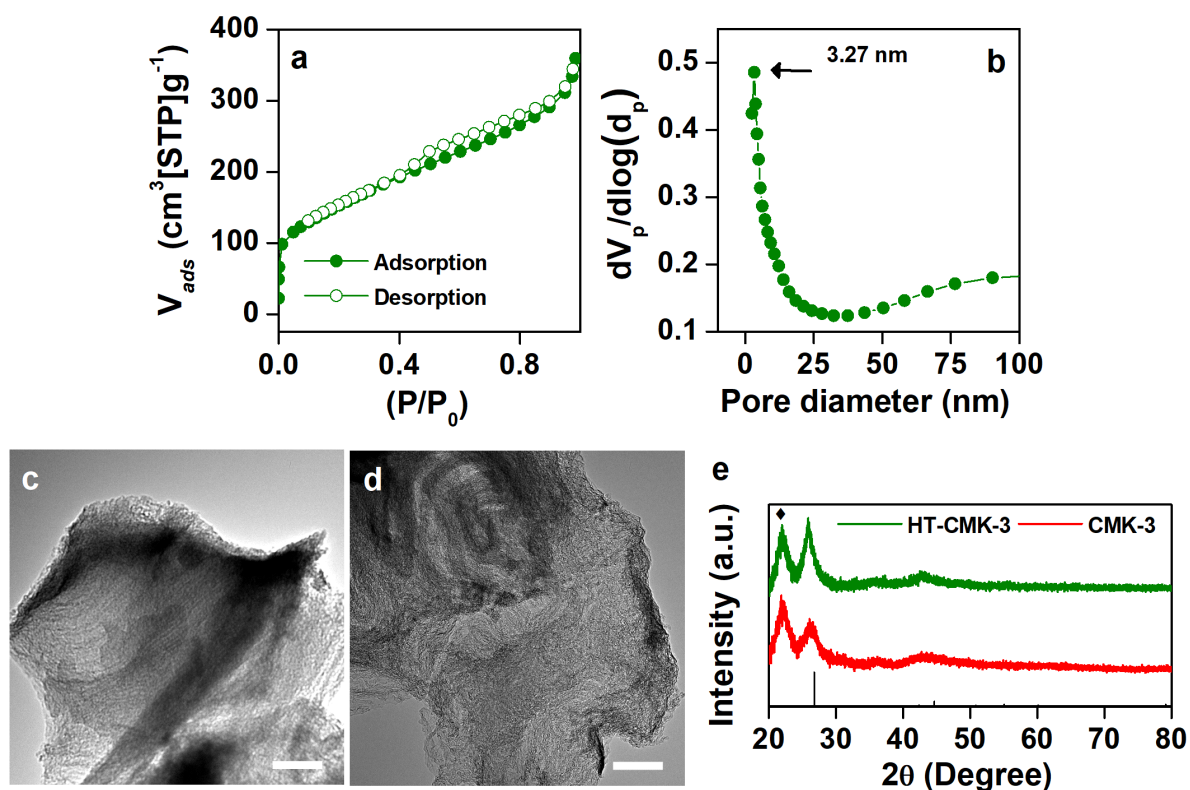

**Supplementary Figure 12** Characterizations of high-temperature annealed CMK-3 (HT-CMK-3). **a** N<sub>2</sub> adsorption/desorption isotherm, **b** BJH pore-size distribution, **c–d** TEM images of HT-CMK-3. The scale bars indicate 100 nm. **e** XRD data for as-prepared HT-CMK-3 (green, top) and CMK-3 (red, bottom) with the reference of graphite 002 ( $2\theta = 26.7^\circ$ ) and 101 reflection ( $2\theta = 44.6^\circ$ ) in the bottom line<sup>3</sup>. The increasing intensity and decreasing FWHM (full width at half maximum) of 002 reflection indicate more ordering in turbostratic carbon by annealing<sup>4</sup> but along with the disordered and clogged mesoporous channels in TEM images. The ( $\blacklozenge$ ) peak at  $2\theta = 22^\circ$  comes from the Kapton tape used to cover the samples.

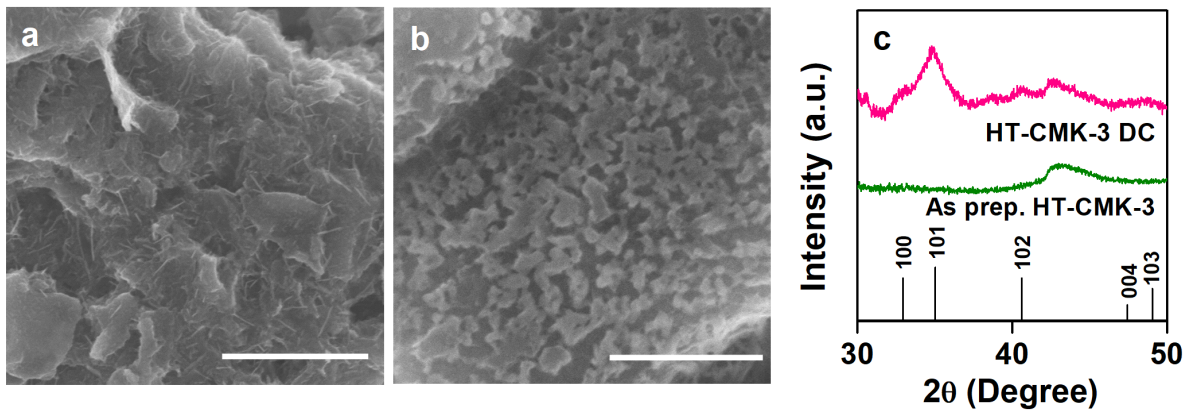

**Supplementary Figure 13** SEM image and XRD result of HT-CMK-3 after DC to the fixed capacity of 1 mAh and a current rate of  $50 \text{ mA g}^{-1}_{\text{carbon}}$ . **a–b** SEM images in different areas of 1DC with **a** flake-shaped products and **b** lumps. The scale bars in **a** and **b** represent 1  $\mu\text{m}$  and 500 nm respectively. **c** XRD patterns for as-prepared HT-CMK-3 (green) and after 1DC (pink) with the standard reference of  $\text{Li}_2\text{O}_2$  (bottom line). The crystalline  $\text{Li}_2\text{O}_2$  reflections clearly appear after DC.

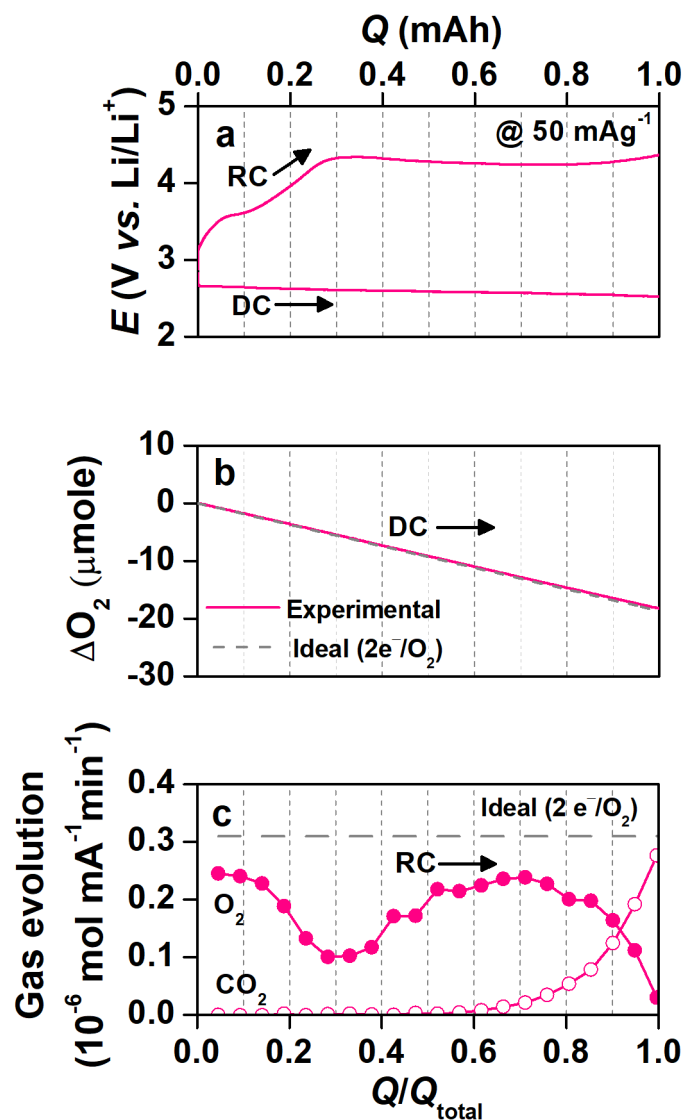

**Supplementary Figure 14** *In situ* gas analysis for HT-CMK-3. **a** DC-RC curve at current rate of 50 mA g<sup>-1</sup> carbon and limited capacity of 1.0 mAh. **b** The gas pressure with the corresponding DC (overall avg. 2.04 e<sup>-</sup>/O<sub>2</sub>). **c** O<sub>2</sub> gas (overall avg. 3.30 e<sup>-</sup>/O<sub>2</sub>) and CO<sub>2</sub> gas (over 0.6RC) evolution with the corresponding RC. The dashed line represents the ideal 2 e<sup>-</sup>/O<sub>2</sub>.

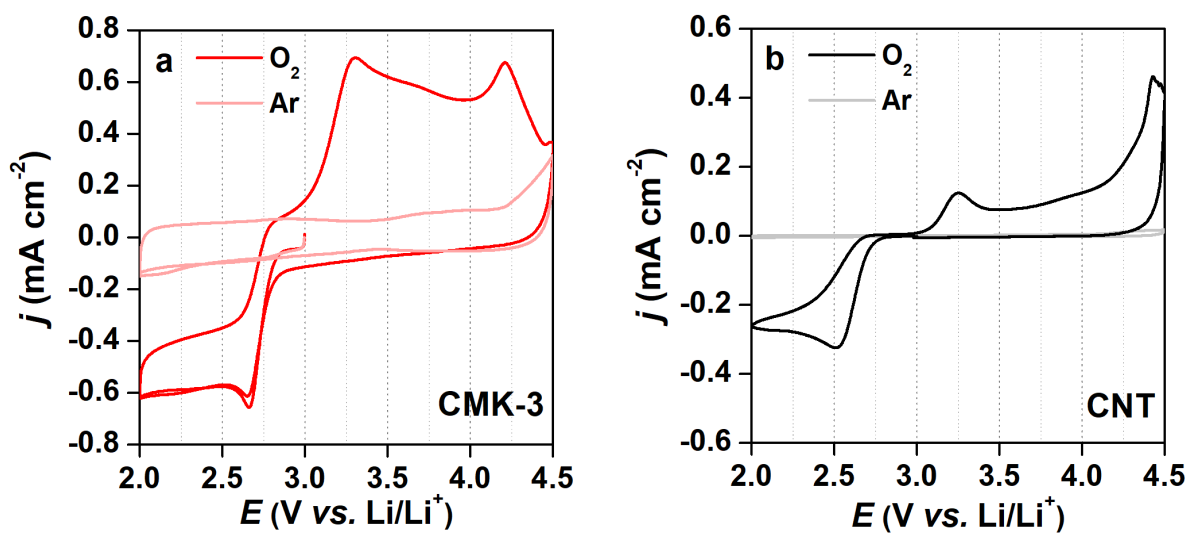

**Supplementary Figure 15** CV curves same as Figure 5 but with  $j$  vs.  $E$  format for **a** CMK-3 and **b** CNT at a potential sweeping rate of 1 mV s<sup>-1</sup>.

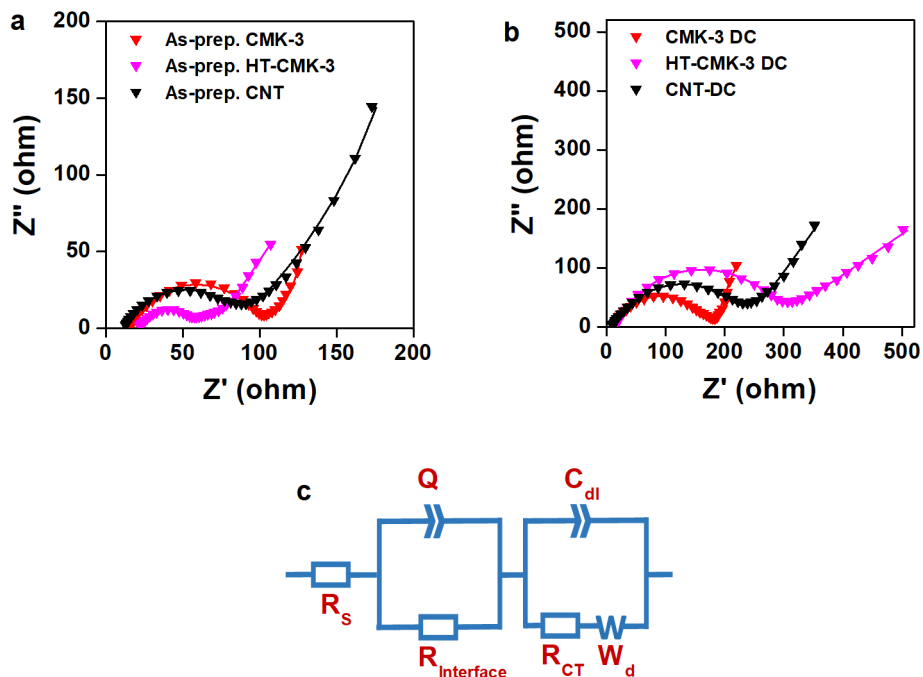

**Supplementary Figure 16** Electrochemical impedance spectroscopy (EIS) analysis of **a** as-prepared and **b** 1DC CMK-3, HT-CMK-3 and CNT electrodes. The 1DC was examined at a fixed capacity of 1.0 mAh and a constant current of  $50 \text{ mA g}^{-1}_{\text{carbon}}$ . The dotted symbols and solid lines denote experimental data and simulated curves according to **c** the equivalent circuit, respectively. The  $R_s$  includes the ohmic resistance of electrolyte solution, and the electronic resistances of current collectors and metallic Li electrode. The  $R_{interface}$  and  $Q$  denote the resistance and constant phase element of an interface layer, likely a cathode electrolyte interface (CEI) layer<sup>5</sup>, respectively. The  $R_{CT}$  represents the charge-transfer resistance of the surface layer on the carbon electrode in parallel with its double layer capacitance,  $C_{dl}$ . The  $W_d$  is the diffusion related factors of  $\text{Li}^+$  ion.

The  $R_{interface}$  and  $R_{CT}$  values are significantly affected from  $\text{Li}_2\text{O}_2$  after DC. From the simulated curves, the sum of  $R_{interface}$  and  $R_{CT}$  for as-prepared electrodes is estimated to  $84 \text{ } \Omega$  for CMK-3,  $45 \text{ } \Omega$  for HT-CMK-3 and  $78 \text{ } \Omega$  for CNT. It is apparent that HT-CMK-3 and CNT electrode have lower resistance than CMK-3 electrode. After DC, the sum of  $R_{interface}$  and  $R_{CT}$  is increased to  $170 \text{ } \Omega$  for CMK-3,  $301 \text{ } \Omega$  for HT-CMK-3 and  $220 \text{ } \Omega$  for CNT, demonstrating the lowest resistance of ultrathin and amorphous  $\text{Li}_2\text{O}_2$  from CMK-3 and the highest one of crystalline and lump-shape  $\text{Li}_2\text{O}_2$  from HT-CMK-3.



**Supplementary Table 1** Total surface area ( $SA_{total}$ ), volume ( $V_{total}$ ), diameters of mesopores ( $d_{meso}$ ), micropores ( $d_{micro}$ ) and volume for mesopore ( $V_{meso}$ ) and micropore ( $V_{micro}$ ) for CMK-3 and high temperature-annealing CMK-3 (hereon denoted as HT-CMK-3). The diameters of meso- and micropores are similar to CMK-3 and HT-CMK-3 whereas  $SA_{total}$  and  $V_{total}$  is reduced by almost half. O/C indicates atomic ratio of oxygen to carbon acquired from X-ray photoelectron spectroscopy (XPS). The atomic ratio of O is insignificant for both electrodes and its decreasing after high-temperature annealing does not significantly alter the wetting of electrode from tetraglyme electrolyte solution<sup>6</sup>.

|                 | $SA_{total}$<br>( $m^2g^{-1}$ ) | $d_{meso}$<br>(nm) | $d_{micro}$<br>(nm) | $V_{total}$<br>( $cm^3g^{-1}$ ) | $V_{meso}$<br>( $cm^3g^{-1}$ ) | $V_{micro}$<br>( $cm^3g^{-1}$ ) | O/C  |
|-----------------|---------------------------------|--------------------|---------------------|---------------------------------|--------------------------------|---------------------------------|------|
| <b>CMK-3</b>    | 1128                            | 3.74               | 0.71                | 0.9308                          | 0.6661                         | 0.2647                          | 0.06 |
| <b>HT-CMK-3</b> | 546                             | 3.27               | 0.70                | 0.5557                          | 0.4340                         | 0.1217                          | 0.03 |

**Supplementary Table 2** Calculated DC and RC overpotentials for all sites in Supplementary Figure 7.

| #                                                | DC   | RC   |
|--------------------------------------------------|------|------|
| 1                                                | 0.05 | 0.03 |
| 2                                                | 0.48 | 0.31 |
| 3                                                | 0.46 | 0.79 |
| 4                                                | 0.28 | 0.51 |
| 5                                                | 0.29 | 0.48 |
| 6                                                | 0.26 | 0.14 |
| 7                                                | 0.47 | 0.28 |
| 8                                                | 0.14 | 0.28 |
| 9                                                | 0.33 | 0.36 |
| 10                                               | 0.47 | 0.40 |
| 11                                               | 0.69 | 1.07 |
| 12                                               | 0.53 | 0.45 |
| 13                                               | 0.23 | 0.20 |
| 14                                               | 0.43 | 0.40 |
| 15                                               | 0.57 | 0.84 |
| 16                                               | 0.30 | 0.26 |
| (11 $\bar{1}$ 00) Li <sub>2</sub> O <sub>2</sub> | 0.52 | 0.86 |

## Supplementary References

- 1 Hong, M., Choi, H. C. & Byon, H. R. Nanoporous NiO plates with a unique role for promoted oxidation of carbonate and carboxylate species in the Li–O<sub>2</sub> battery. *Chem. Mater.* **27**, 2234–2241 (2015).
- 2 Tian, F., Radin, M. D. & Siegel, D. J. Enhanced charge transport in amorphous Li<sub>2</sub>O<sub>2</sub>. *Chem. Mater.* **26**, 2952–2959 (2014).
- 3 Li, Z. Q., Lu, C. J., Xia, Z. P., Zhou, Y. & Luo, Z. X-ray diffraction patterns of graphite and turbostratic carbon. *Carbon* **45**, 1686–1695 (2007).
- 4 Inagaki, M., Toyoda, M. & Tsumura, T. Control of crystalline structure of porous carbons. *RSC Adv.* **4**, 41411–41424 (2014).
- 5 Bardenhagen, I. *et al.* In situ investigation of pore clogging during discharge of a Li/O<sub>2</sub> battery by electrochemical impedance spectroscopy. *J. Power Sources* **278**, 255–264 (2015).
- 6 Wong, R. A. *et al.* Structurally tuning Li<sub>2</sub>O<sub>2</sub> by controlling the surface properties of carbon electrodes: Implications for Li–O<sub>2</sub> batteries. *Chem. Mater.* **28**, 8006–8015 (2016).
